# Supplementary material for: Fundamental kinetic and selectivity properties of the anti-aging, antioxidant-active ingredient EUK-134
Source: Royal Society of Chemistry journal article supplement (doi:10.1039/d5dt02480c), 2026-01-01
Supplement: d5dt02480c1.pdf [file d5dt02480c1.pdf]

**Supporting Information**

**Fundamental Kinetic and Selectivity Properties of the Anti-Aging,  
Antioxidant Active Ingredient EUK-134**

Nora Del Bosque<sup>a</sup>, Grant T. Elam<sup>b</sup>, David M. Freire<sup>a</sup>, Timothy J. Hubin<sup>b</sup>, and Kayla N. Green<sup>a</sup>

<sup>a</sup> Department of Chemistry and Biochemistry, Texas Christian University, Fort Worth, TX 76129

<sup>b</sup> Department of Chemistry, Southwestern Oklahoma State University, Weatherford, OK 73096

## Table of Contents

|                                                                                                                                                                                                                                                                                                                     |   |
|---------------------------------------------------------------------------------------------------------------------------------------------------------------------------------------------------------------------------------------------------------------------------------------------------------------------|---|
| <b>Figure S1.</b> (A) Order with respect to EUK-134. $[H_2O_2]$ was held constant at 150 mM. ( $y = 1.04x - 0.290$ ). (B) Plots used to determine the order of the reaction with respect to $H_2O_2$ . [EUK-134] was held constant at 0.2475 mM. ( $y = 1.01x - 6.84$ ). For both: [Trizma] = 50 mM, pH = 8.1. .... | 3 |
| <b>Table S1.</b> Initial rates obtained for EUK-134 at a range of concentrations and $[H_2O_2]$ at 150 mM, resulting in an order of 1.04 with respect to EUK-134. Conditions are detailed in Figure S1. ....                                                                                                        | 4 |
| <b>Table S2.</b> Initial rates obtained for EUK-134 at 0.2475 mM and $H_2O_2$ varied, resulting in an order of 1.01 with respect to EUK-134. Conditions are detailed in Figure S1. ....                                                                                                                             | 4 |
| <b>Figure S2.</b> (A) Order with respect to EUK-8. $[H_2O_2]$ was held constant at 150 mM. ( $y = 1.00x - 1.78$ ) (B) Plots used to determine the order of the reaction with respect to $H_2O_2$ . [EUK-8] was held constant at 0.2475 mM. ( $y = 1.0022x - 7.9612$ ). For both: [Trizma] = 50 mM, pH = 8.1. ....   | 5 |
| <b>Table S3.</b> Initial rates obtained for EUK-8 at a range of concentrations and $[H_2O_2]$ at 150 mM, resulting in an order of 1.00 with respect to EUK-8. Conditions are detailed in Figure S2. ....                                                                                                            | 6 |
| <b>Table S4.</b> Initial rates obtained for EUK-8 at 0.2475 mM and $H_2O_2$ varied, resulting in an order of 1.00 with respect to EUK-8. Conditions are detailed in Figure S2. ....                                                                                                                                 | 6 |
| <b>Table S5.</b> EUK-134 catalase activity after multiple aliquots. $[H_2O_2] = 150$ mM, [Trizma] = 50 mM, pH = 8.1. ....                                                                                                                                                                                           | 7 |
| <b>Table S6.</b> EUK-8 catalase activity after multiple aliquots. $[H_2O_2] = 150$ mM, [Trizma] = 50 mM, pH = 8.1. .                                                                                                                                                                                                | 7 |
| <b>Table S7.</b> Selectivity of EUK-134 for catalase vs peroxidase activity. Catalase assay conditions: 20 $\mu$ M EUK-R, 20 mM $H_2O_2$ (PBS, pH 7.4); Peroxidase assay conditions: 20 $\mu$ M EUK-R, 5 $\mu$ M $H_2O_2$ , 100 $\mu$ M ABTS (PBS, pH 7.4).....                                                     | 8 |
| <b>Figure S3.</b> Example of UV-vis spectra from (Left) Catalase assay: 20 mM EUK-134 upon addition of 20 mM $H_2O_2$ and (right) Peroxidase assay: 20 mM EUK-134, 100 mM ABTS, 5 mM $H_2O_2$ . For both: in phosphate buffer solution, pH 7.4. ....                                                                | 8 |
| <b>Experimental Methods</b> .....                                                                                                                                                                                                                                                                                   | 8 |

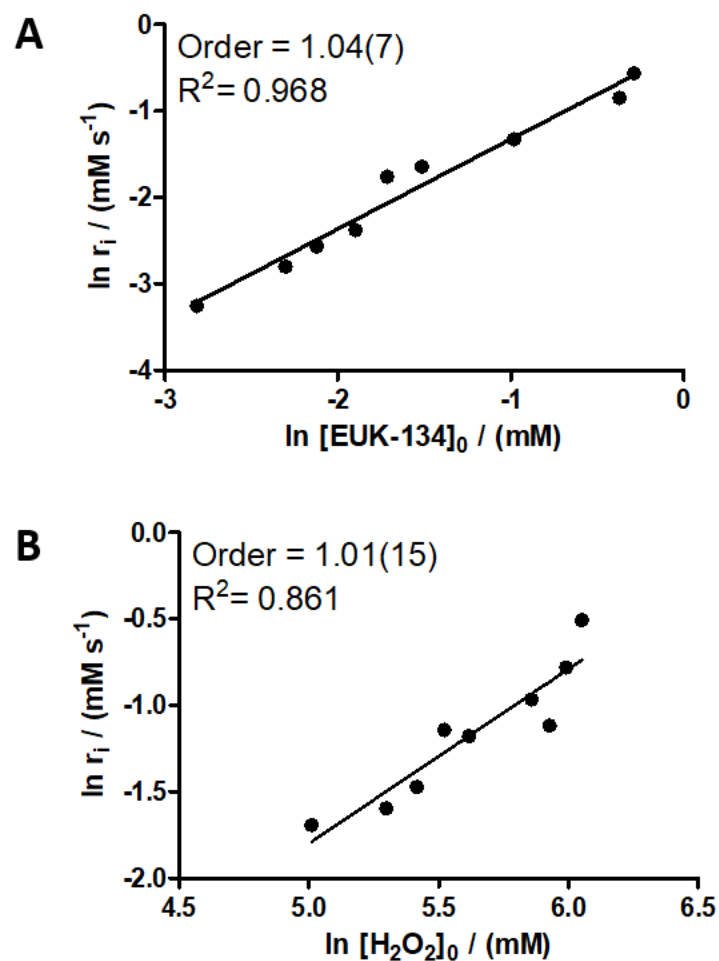

**Figure S1.** (A) Order with respect to EUK-134. [H<sub>2</sub>O<sub>2</sub>] was held constant at 150 mM. ( $y = 1.04x - 0.290$ ). (B) Plots used to determine the order of the reaction with respect to H<sub>2</sub>O<sub>2</sub>. [EUK-134] was held constant at 0.2475 mM. ( $y = 1.01x - 6.84$ ). For both: [Trizma] = 50 mM, pH = 8.1.

**Table S1.** Initial rates obtained for EUK-134 at a range of concentrations and [H<sub>2</sub>O<sub>2</sub>] at 150 mM, resulting in an order of 1.04 with respect to EUK-134. Conditions are detailed in Figure S1.

| [EUK-134] (mM) | $r_i$ (mM s <sup>-1</sup> ) | ln[EUK-134] (mM) | ln( $r_i$ ) (mM s <sup>-1</sup> ) |
|----------------|-----------------------------|------------------|-----------------------------------|
| <b>0.06</b>    | 0.039                       | -2.81            | -3.25                             |
| <b>0.10</b>    | 0.061                       | -2.30            | -2.80                             |
| <b>0.12</b>    | 0.077                       | -2.12            | -2.57                             |
| <b>0.15</b>    | 0.093                       | -1.90            | -2.38                             |
| <b>0.18</b>    | 0.17                        | -1.71            | -1.76                             |
| <b>0.22</b>    | 0.19                        | -1.51            | -1.64                             |
| <b>0.38</b>    | 0.27                        | -0.98            | -1.33                             |
| <b>0.69</b>    | 0.43                        | -0.37            | -0.85                             |
| <b>0.75</b>    | 0.57                        | -0.29            | -0.57                             |

**Table S2.** Initial rates obtained for EUK-134 at 0.2475 mM and H<sub>2</sub>O<sub>2</sub> varied, resulting in an order of 1.01 with respect to EUK-134. Conditions are detailed in Figure S1.

| [H <sub>2</sub> O <sub>2</sub> ] (mM) | $r_i$ (mM s <sup>-1</sup> ) | ln[H <sub>2</sub> O <sub>2</sub> ] (mM) | ln( $r_i$ ) (mM s <sup>-1</sup> ) |
|---------------------------------------|-----------------------------|-----------------------------------------|-----------------------------------|
| <b>150</b>                            | 0.18                        | 5.01                                    | -1.69                             |
| <b>200</b>                            | 0.20                        | 5.30                                    | -1.60                             |
| <b>225</b>                            | 0.23                        | 5.42                                    | -1.47                             |
| <b>275</b>                            | 0.32                        | 5.52                                    | -1.14                             |
| <b>250</b>                            | 0.31                        | 5.62                                    | -1.18                             |
| <b>375</b>                            | 0.38                        | 5.86                                    | -0.97                             |
| <b>350</b>                            | 0.33                        | 5.93                                    | -1.12                             |
| <b>400</b>                            | 0.46                        | 5.99                                    | -0.78                             |
| <b>425</b>                            | 0.60                        | 6.05                                    | -0.51                             |

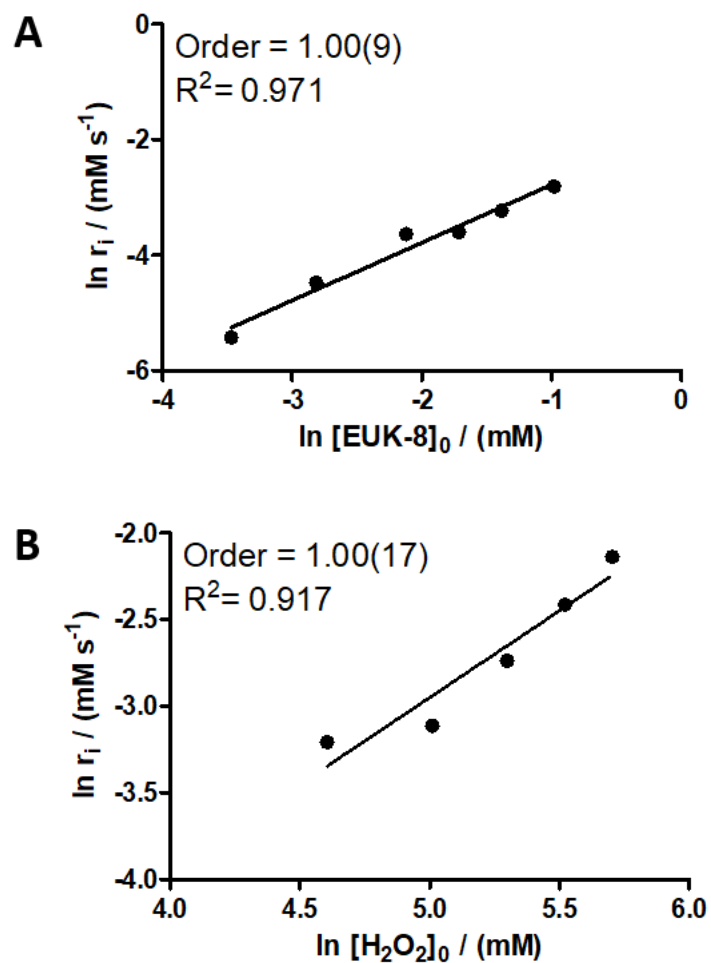

**Figure S2.** (A) Order with respect to EUK-8. [H<sub>2</sub>O<sub>2</sub>] was held constant at 150 mM. ( $y = 1.00x - 1.78$ ) (B) Plots used to determine the order of the reaction with respect to H<sub>2</sub>O<sub>2</sub>. [EUK-8] was held constant at 0.2475 mM. ( $y = 1.0022x - 7.9612$ ). For both: [Trizma] = 50 mM, pH = 8.1.

**Table S3.** Initial rates obtained for EUK-8 at a range of concentrations and  $[\text{H}_2\text{O}_2]$  at 150 mM, resulting in an order of 1.00 with respect to EUK-8. Conditions are detailed in Figure S2.

| <b>[EUK-8] (mM)</b> | <b><math>r_i</math> (mM s<sup>-1</sup>)</b> | <b>ln[EUK-8] (mM)</b> | <b>ln(<math>r_i</math>) (mM s<sup>-1</sup>)</b> |
|---------------------|---------------------------------------------|-----------------------|-------------------------------------------------|
| <b>0.031</b>        | 0.0044                                      | -3.47                 | -5.43                                           |
| <b>0.060</b>        | 0.011                                       | -2.81                 | -4.48                                           |
| <b>0.120</b>        | 0.021                                       | -2.12                 | -3.85                                           |
| <b>0.180</b>        | 0.026                                       | -1.71                 | -3.65                                           |
| <b>0.250</b>        | 0.039                                       | -1.39                 | -3.23                                           |
| <b>0.375</b>        | 0.062                                       | -0.98                 | -2.79                                           |

**Table S4.** Initial rates obtained for EUK-8 at 0.2475 mM and  $\text{H}_2\text{O}_2$  varied, resulting in an order of 1.00 with respect to EUK-8. Conditions are detailed in Figure S2.

| <b><math>[\text{H}_2\text{O}_2]</math> (mM)</b> | <b><math>r_i</math> (mM s<sup>-1</sup>)</b> | <b>ln<math>[\text{H}_2\text{O}_2]</math> (mM)</b> | <b>ln(<math>r_i</math>) (mM s<sup>-1</sup>)</b> |
|-------------------------------------------------|---------------------------------------------|---------------------------------------------------|-------------------------------------------------|
| <b>100</b>                                      | 0.040                                       | 4.61                                              | -3.21                                           |
| <b>150</b>                                      | 0.044                                       | 5.01                                              | -3.11                                           |
| <b>200</b>                                      | 0.065                                       | 5.30                                              | -2.74                                           |
| <b>250</b>                                      | 0.089                                       | 5.52                                              | -2.41                                           |
| <b>300</b>                                      | 0.12                                        | 5.70                                              | -2.14                                           |

**Table S5.** EUK-134 catalase activity after multiple aliquots.  $[\text{H}_2\text{O}_2] = 150 \text{ mM}$ ,  $[\text{Trizma}] = 50 \text{ mM}$ ,  $\text{pH} = 8.1$ .

| <b>EUK-134</b>            | <b>1st aliquot <math>\text{H}_2\text{O}_2</math></b> |                                         |                                                                |
|---------------------------|------------------------------------------------------|-----------------------------------------|----------------------------------------------------------------|
|                           | <b>TON</b>                                           | <b>TOF (<math>\text{s}^{-1}</math>)</b> | <b><math>\text{R}_i</math> (<math>\text{mM s}^{-1}</math>)</b> |
| <b>T1</b>                 | 27.44                                                | 0.18                                    | 0.61                                                           |
| <b>T2</b>                 | 19.49                                                | 0.13                                    | 0.39                                                           |
| <b>T3</b>                 | 25.08                                                | 0.17                                    | 0.45                                                           |
| <b>Average</b>            | 24.00                                                | 0.16                                    | 0.48                                                           |
| <b>Standard Deviation</b> | 4.08                                                 | 0.03                                    | 0.11                                                           |
|                           | <b>2nd aliquot <math>\text{H}_2\text{O}_2</math></b> |                                         |                                                                |
| <b>T1</b>                 | 30.84                                                | 0.21                                    | 0.44                                                           |
| <b>T2</b>                 | 31.45                                                | 0.21                                    | 0.42                                                           |
| <b>T3</b>                 | 29.30                                                | 0.20                                    | 0.47                                                           |
| <b>Average</b>            | 30.53                                                | 0.20                                    | 0.45                                                           |
| <b>Standard Deviation</b> | 1.11                                                 | 0.01                                    | 0.02                                                           |
|                           | <b>3rd aliquot <math>\text{H}_2\text{O}_2</math></b> |                                         |                                                                |
| <b>T1</b>                 | 20.62                                                | 0.10                                    | 0.19                                                           |
| <b>T2</b>                 | 21.06                                                | 0.11                                    | 0.29                                                           |
| <b>T3</b>                 | 20.56                                                | 0.10                                    | 0.30                                                           |
| <b>Average</b>            | 20.75                                                | 0.104                                   | 0.26                                                           |
| <b>Standard Deviation</b> | 0.28                                                 | 0.001                                   | 0.06                                                           |

**Table S6.** EUK-8 catalase activity after multiple aliquots.  $[\text{H}_2\text{O}_2] = 150 \text{ mM}$ ,  $[\text{Trizma}] = 50 \text{ mM}$ ,  $\text{pH} = 8.1$ .

| <b>EUK-8</b>              |            |                                         |                                             |
|---------------------------|------------|-----------------------------------------|---------------------------------------------|
| <b>Trial</b>              | <b>TON</b> | <b>TOF (<math>\text{s}^{-1}</math>)</b> | <b>Rate (<math>\text{mM s}^{-1}</math>)</b> |
| <b>1</b>                  | 18.75      | 0.13                                    | 0.36                                        |
| <b>2</b>                  | 11.14      | 0.10                                    | 0.25                                        |
| <b>3</b>                  | 11.36      | 0.08                                    | 0.44                                        |
| <b>4</b>                  | 16.34      | 0.11                                    | 0.38                                        |
| <b>5</b>                  | 18.97      | 0.13                                    | 0.44                                        |
| <b>6</b>                  | 16.32      | 0.11                                    | 0.42                                        |
| <b>Average</b>            | 15.48      | 0.11                                    | 0.42                                        |
| <b>Standard Deviation</b> | 3.47       | 0.018                                   | 0.03                                        |

**Table S7.** Selectivity of EUK-134 for catalase vs peroxidase activity. Catalase assay conditions: 20  $\mu$ M EUK-R, 20 mM H<sub>2</sub>O<sub>2</sub> (PBS, pH 7.4); Peroxidase assay conditions: 20  $\mu$ M EUK-R, 5  $\mu$ M H<sub>2</sub>O<sub>2</sub>, 100  $\mu$ M ABTS (PBS, pH 7.4).

| Trial              | TON Catalase | TON Peroxidase | TOF Catalase          | TOF Peroxidase        | C/P                |
|--------------------|--------------|----------------|-----------------------|-----------------------|--------------------|
| 1                  | 112.39       | 0.443          | $1.56 \times 10^{-2}$ | $6.15 \times 10^{-5}$ | $2.54 \times 10^2$ |
| 2                  | 145.41       | 0.518          | $2.02 \times 10^{-2}$ | $7.19 \times 10^{-5}$ | $2.81 \times 10^2$ |
| 3                  | 120.30       | 0.430          | $1.67 \times 10^{-2}$ | $5.97 \times 10^{-5}$ | $2.80 \times 10^2$ |
| Average            | 126.03       | 0.46           | 0.018                 | $6.44 \times 10^{-5}$ | 272                |
| Standard Deviation | 17.24        | 0.05           | 0.002                 | $6.6 \times 10^{-6}$  | 15                 |

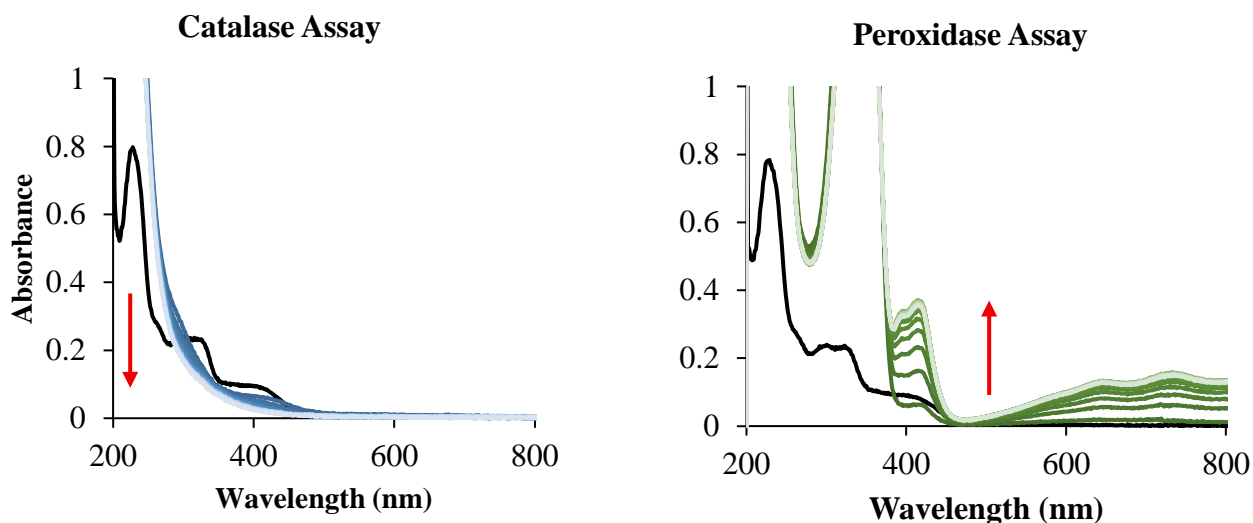

**Figure S3.** Example of UV-vis spectra from (Left) Catalase assay: 20  $\mu$ M EUK-134 upon addition of 20 mM H<sub>2</sub>O<sub>2</sub> and (right) Peroxidase assay: 20 mM EUK-134, 100 mM ABTS, 5 mM H<sub>2</sub>O<sub>2</sub>. For both: in phosphate buffer solution, pH 7.4.

## Experimental Methods

**Quantifying Catalase Activity for Efficiency and Robustness Studies.** Molecular oxygen evolution from the decomposition of H<sub>2</sub>O<sub>2</sub> was measured via an O<sub>2</sub> microsensor probe (UniSense, Denmark) placed in a hermetically sealed 15 mL reactor. In each experiment, 1.5 mL of a 1.5 mM catalyst solution in 50 mM tris(hydroxymethyl)aminomethane (Tris) buffer (pH 8.1)



was added to the reactor. For calibration, room pressure was set at 159 mmHg then the cell was flushed with N<sub>2</sub> for 30 s until pressure reached 0 mV. Subsequently, 0.5 mL of 150 mM H<sub>2</sub>O<sub>2</sub> was introduced, and measurements were conducted at 298 K. The reaction was recorded  $\Delta P_{O_2}$  (mmHg) vs. time (seconds) until complete saturation occurred ( $V_{\max}$ ). The data were collected at 0.2 s intervals and the baseline-O<sub>2</sub> concentration, which was calculated from readings obtained 30 s before the initiation of the reaction was subtracted from all initial values.

Using the ideal gas law,  $\Delta P_{O_2}$  was used to calculate the number of O<sub>2</sub> moles L<sup>-1</sup> produced from the headspace of the reactor (13 mL) via equation 1:

$$PV = nRT \quad (1)$$

P = pressure (atm), R = 0.08206 atm L mol<sup>-1</sup>K<sup>-1</sup>, n = millimoles (mM), T = 298 K and V = 0.013 L.

The TON was calculated for 1.5 mM EUK-134 (the total solution volume after H<sub>2</sub>O<sub>2</sub> addition was 2 mL) via equation 2 for the total reaction time:

$$TON = \frac{\text{moles of } O_2 \text{ produced}}{\text{moles of Catalyst}} \quad (2)$$

The TOF was determined via equation 3:

$$TOF(s^{-1}) = \frac{TON}{\text{reaction time (s)}} \quad (3)$$

To determine whether complex decomposition resulted from reactions with H<sub>2</sub>O<sub>2</sub> or pH fluctuations, the pH was monitored before and after the addition of H<sub>2</sub>O<sub>2</sub>. The tris buffer (pH 8.0) remained stable throughout the experiments, confirming that decomposition was driven by H<sub>2</sub>O<sub>2</sub> interactions rather than environmental conditions. The robustness was evaluated by adding a single

aliquot of H<sub>2</sub>O<sub>2</sub> (150 mM per aliquot) after oxygen evolution had plateaued from the previous H<sub>2</sub>O<sub>2</sub> aliquot addition in the same closed cell.

**Kinetics: Determining the reaction order with respect to the catalyst.** To determine the reaction order with respect to the catalyst, experiments were conducted where the concentration of 150 mM H<sub>2</sub>O<sub>2</sub> was held constant, and the concentration of the catalyst was varied in 50 mM Trisma buffer at 298 K with an O<sub>2</sub> microsensor probe (UniSense, Denmark) to obtain equation **4**, which was derived from equation **(1)**:

$$r_i = k_{obs}[Catalyst]^n \quad (4)$$

This setup analyzes the effect of the catalyst concentration on the  $r_i$ . In each experiment, the pressure from the evolution of O<sub>2</sub> was monitored over time, measured in mmHg, and converted to mM s<sup>-1</sup> of O<sub>2</sub> produced. The  $r_i$  was obtained by systematically calculating the slope over different time intervals after H<sub>2</sub>O<sub>2</sub> injection (90-150 s, 150-210 s, 170-230 s, etc.) to identify the steepest slope, which is representative of the maximum rate at the initial point of the reaction (Equation **5**):

$$r_i = \frac{\Delta[O_2]}{\Delta t} \quad (5)$$

The slope of the natural log of the initial rates represents the order with respect to the catalyst ( $n$ ) in equation **1** (S1A & S2A). Equation **(4)** was rearranged to obtain equation **(6)**, which is a linear relationship between the initial rates (mM s<sup>-1</sup>) and the catalyst concentrations (mM) with the slope representing  $k_{obs}$  (s<sup>-1</sup>) in **Figures 3a & 4a**:

$$k_{obs} = \frac{r_i}{[Catalyst]} \quad (6)$$

To obtain the overall 2<sup>nd</sup> order constant kinetic constant ( $k$ ) in equation **1**,  $k_{obs}$  was divided by the constant concentration of 150 mM H<sub>2</sub>O<sub>2</sub> used in this series of experiments (Equation **7**):

$$k = \frac{k_{obs}}{[H_2O_2]} \quad (7)$$

**Determining the reaction order with respect to H<sub>2</sub>O<sub>2</sub>.** In a complementary set of experiments, the concentration of H<sub>2</sub>O<sub>2</sub> varied while the concentration of catalyst was held constant. The initial rates of the reaction were again measured by monitoring the amount of oxygen produced. A plot of the initial rates ( $r_i$ ) versus H<sub>2</sub>O<sub>2</sub> concentration was used to determine  $k_{obs}$ , the reaction order with respect to H<sub>2</sub>O<sub>2</sub> ( $m$ ) and the overall 2<sup>nd</sup> order kinetic constant ( $k$ ) (**Figure 3b, 4b, S1B, S2B**).

### Selectivity Experimental Methods

**Peroxidase Activity.** This assay was adapted from previously reported methods by Doctrow *et al.* and Lu *et al.*, which inspired the design of our peroxidase activity measurements.<sup>1, 28</sup> The peroxidase activity of the catalysts was determined by monitoring the H<sub>2</sub>O<sub>2</sub>-dependent oxidation of 2,2'-azino-bis(3-ethylbenzothiazoline-6-sulfonic acid) (ABTS) to its radical cation (ABTS<sup>•+</sup>) at 414 nm via UV-Vis spectrophotometry (200-900 nm). While Doctrow *et al.* monitored ABTS<sup>•+</sup> formation at 714 nm, we opted to monitor the absorbance at 414 nm, which was based on the work of Cano *et. al.*, who experimentally determined the molar extinction coefficient to be  $\epsilon_{414} = 31,100 \text{ M}^{-1} \text{ cm}^{-1}$ .<sup>1, 32</sup> Although there is a minor overlap with the catalyst absorbance at this wavelength, appropriate controls and background subtraction were used to accurately quantify the formation of ABTS<sup>•+</sup>. The reaction was initiated by adding 5  $\mu\text{M}$  H<sub>2</sub>O<sub>2</sub> to a solution of phosphate-buffered saline (PBS, pH 7.4) containing 100  $\mu\text{M}$  ABTS and 20  $\mu\text{M}$  of the catalyst for a total volume of 3 mL in a quartz cuvette at 298 K. The increase in absorbance at 414 nm was monitored every 5 min over a 2-h period, indicating the formation of ABTS<sup>•+</sup>. The molar extinction coefficient ( $\epsilon_{414} = 31,100 \text{ M}^{-1} \text{ cm}^{-1}$ ) was used to calculate the concentration of ABTS<sup>•+</sup>

during the reaction via Beer's Law ( $A = \epsilon cl$ ).<sup>32</sup> The controls included PBS (blank), H<sub>2</sub>O<sub>2</sub> alone, ABTS alone, and the catalyst alone under identical conditions. The TON for peroxidase activity was calculated via equation 8:

$$TON_{Peroxidase} = \frac{\text{moles of ABTS}^{\cdot+} \text{ Produced}}{\text{moles of Catalyst}} \quad (8)$$

The TOF was calculated via equation 9:

$$TOF_{Peroxidase}(s^{-1}) = \frac{TON_{Peroxidase}}{\text{reaction time (s)}} \quad (9)$$

**Catalase Activity.** The catalase activity of the synthesized catalysts was assessed by monitoring the disproportionation of H<sub>2</sub>O<sub>2</sub> into water and oxygen via UV-vis spectrophotometry (200–900 nm range). The catalyst (20 μM) was added to a phosphate-buffered saline solution (PBS, pH 7.4) and the reaction was initiated by the addition of H<sub>2</sub>O<sub>2</sub> (20 mM) for a total volume of 3 mL in a quartz cuvette at 298 K. The reaction was monitored every 5 min over a 2-h period by tracking the decrease in absorbance at 240 nm, which is characteristic of H<sub>2</sub>O<sub>2</sub>. The cuvette was inverted between each scan to ensure negligible oxygen interference. The concentration of H<sub>2</sub>O<sub>2</sub> was determined via Beer's law ( $A = \epsilon cl$ ) with a molar absorptivity of  $\epsilon_{240} = 43.6 \text{ M}^{-1} \text{ cm}^{-1}$ .<sup>28</sup> The TON of H<sub>2</sub>O<sub>2</sub> consumption was calculated via equation 10, and the TOF was calculated via equation 11:

$$TON_{Catalase} = \frac{\text{moles of H}_2\text{O}_2 \text{ consumed}}{\text{moles of Catalyst}} \quad (10)$$

$$TOF_{Catalase}(s^{-1}) = \frac{TON_{Catalase}}{\text{reaction time (s)}} \quad (11)$$

The controls included PBS (blank), H<sub>2</sub>O<sub>2</sub> alone, and the catalyst alone. The selectivity was calculated via equation **12**:

$$\textbf{Selectivity (C/P)} = \frac{\textit{Catalase}_{TOF(s^{-1})}}{\textit{Peroxidase}_{TOF(s^{-1})}} \quad \textbf{(12)}$$
